# Supplementary material for: A novel Zn2GeO4 superstructure for effective photocatalytic hydrogen generation
Source: Royal Society of Chemistry journal article supplement (doi:10.1039/c3ta11374d), 2013-01-01
Supplement: c3ta11374d.pdf [file c3ta11374d.pdf]

## Supporting Information

### A novel $\text{Zn}_2\text{GeO}_4$ superstructure for effective photocatalytic hydrogen generation

Jun Liang,<sup>a,b</sup> Jie Xu,<sup>a</sup> Quan Gu,<sup>a</sup> Yangen Zhou,<sup>a</sup> Changcang Huang,<sup>a</sup> Huaxiang Lin,<sup>a</sup>  
and Xuxu Wang<sup>\*a</sup>

<sup>a</sup>Research Institute of Photocatalysis, Fujian Provincial Key Laboratory of Photocatalysis–State Key Laboratory Breeding Base, Fuzhou University, Fujian 350002, China.

Email: xwang@fzu.edu.cn (X.Wang)

<sup>b</sup>College of Chemistry and Chemical Engineering, Ningxia University, Yinchuan 750021, China.

### Experimental section

#### 1. Synthesis

**Preparation of bulk  $\text{Zn}_2\text{GeO}_4$  particles.** Bulk  $\text{Zn}_2\text{GeO}_4$  particles were prepared by heating a stoichiometric mixture of  $\text{GeO}_2$  and  $\text{ZnO}$  at 1473 K (ramp  $5^\circ\text{C} \cdot \text{min}^{-1}$ ) for 15 h using a conventional solid state reaction method.

**Preparation of  $\text{Zn}_2\text{GeO}_4$  nanoribbons<sup>1</sup>.**  $\text{Zn}_2\text{GeO}_4$  nanoribbons were reproduced from a published solvothermal route in a binary ethylenediamine/ $\text{H}_2\text{O}$  solvent system. In a typical synthesis, 0.26 g (2.5 mmol) of  $\text{GeO}_2$ , and 1.10 g (5 mmol) of  $\text{Zn}(\text{CH}_3\text{COO})_2 \cdot 2\text{H}_2\text{O}$  were added to 15 mL of solvents which includes 10 mL of ethylenediamine and 5 mL of deionized water. The mixture was stirred for 1 h and then transferred to a 20 mL Teflon-lined stainless steel autoclave, sealed and maintained at 453 K for 24 h, followed by cooling naturally to room temperature. The resulted solid product was collected by centrifugation and washed several times with distilled water and absolute ethanol. The solid was dried in a vacuum oven at 343 K

for 12 h.

***Preparation of  $\text{Zn}_2\text{GeO}_4$  nanorods***<sup>2</sup>.  $\text{Zn}_2\text{GeO}_4$  nanorods were reproduced from a published surfactant-assisted hydrothermal method. In a typical synthesis, 0.10 g of cetyltrimethylammonium bromide (CTAB), 0.52 g of  $\text{GeO}_2$ , and 1.10 g of  $\text{Zn}(\text{CH}_3\text{COO})_2 \cdot 2\text{H}_2\text{O}$  were added to 15 mL of deionized water. The pH value of the resulting mixture was adjusted to pH 8 by adding NaOH. The mixture was stirred for 1 h and then transferred to a 20 mL Teflon-lined stainless steel autoclave, sealed and maintained at 413 K for 24 h, followed by cooling naturally to room temperature. The resulted solid product was collected by centrifugation and washed several times with distilled water and absolute ethanol. The solid was dried in a vacuum oven at 343 K for 12 h.

***Preparation of hexagonal  $\text{Zn}_2\text{GeO}_4$  nanorods***. A typical synthesis of hexagonal  $\text{Zn}_2\text{GeO}_4$  nanorods was as following: 0.40 g of sodium dodecyl sulfate (SDS) was dissolved into 60 mL of deionized water under stirring. Then, 4.4 g of  $\text{Zn}(\text{CH}_3\text{COO})_2 \cdot 2\text{H}_2\text{O}$  and 1.08 g of  $\text{GeO}_2$  was added into the above solution in turn. Subsequently, appropriate amount of NaOH was added into the above solution (pH $\approx$ 8.5). The mixture (ca. 80 mL) was stirred at room temperature for 2 h, followed by transferring the mixture into a 100 mL of Teflon-lined stainless steel autoclave, sealed and maintained at 453 K for 24 h. After cooling to room temperature, the resulted solid was collected by centrifugation and washed several times with distilled water and absolute ethanol. The solid was dried in a under vacuum oven at 343 K for 12 h.

## 2. Characterization

**Table S0** Nitrogen adsorption-desorption isotherm linear plot of hexagonal

Zn<sub>2</sub>GeO<sub>4</sub> nanorod-bundles

| Adsorption                  |                                               | Desorption                  |                                               |
|-----------------------------|-----------------------------------------------|-----------------------------|-----------------------------------------------|
| Relative Pressure<br>(P/Po) | Quantity Adsorbed<br>(cm <sup>3</sup> /g STP) | Relative Pressure<br>(P/Po) | Quantity Adsorbed<br>(cm <sup>3</sup> /g STP) |
| 0.009692                    | 1.435966                                      | 0.995013                    | 42.48768                                      |
| 0.034057                    | 1.813242                                      | 0.98142                     | 35.24321                                      |
| 0.068522                    | 2.145649                                      | 0.96996                     | 29.25792                                      |
| 0.079947                    | 2.238565                                      | 0.944436                    | 19.91699                                      |
| 0.100019                    | 2.379155                                      | 0.926429                    | 16.06034                                      |
| 0.119977                    | 2.509629                                      | 0.902732                    | 12.67688                                      |
| 0.140011                    | 2.622452                                      | 0.87547                     | 10.16946                                      |
| 0.159994                    | 2.723494                                      | 0.851266                    | 8.671963                                      |
| 0.180003                    | 2.815764                                      | 0.825225                    | 7.497806                                      |
| 0.200006                    | 2.900293                                      | 0.800666                    | 6.729816                                      |
| 0.249877                    | 3.073511                                      | 0.750196                    | 5.57846                                       |
| 0.300058                    | 3.23663                                       | 0.699813                    | 4.882758                                      |
| 0.349976                    | 3.365725                                      | 0.65008                     | 4.385743                                      |
| 0.399729                    | 3.47037                                       | 0.599909                    | 4.041821                                      |
| 0.450509                    | 3.585565                                      | 0.549946                    | 3.784258                                      |
| 0.499774                    | 3.724347                                      | 0.500051                    | 3.576381                                      |
| 0.549851                    | 3.8779                                        | 0.450206                    | 3.267416                                      |
| 0.599784                    | 4.071802                                      | 0.381154                    | 3.097994                                      |
| 0.650478                    | 4.306419                                      | 0.330964                    | 2.971086                                      |
| 0.700285                    | 4.633008                                      | 0.280943                    | 2.852724                                      |
| 0.750657                    | 5.123839                                      | 0.230982                    | 2.695177                                      |
| 0.8002                      | 5.837914                                      | 0.18099                     | 2.507891                                      |
| 0.820434                    | 6.284572                                      | 0.124818                    | 2.200435                                      |
| 0.850732                    | 7.153326                                      |                             |                                               |
| 0.87552                     | 8.199555                                      |                             |                                               |
| 0.900402                    | 9.732702                                      |                             |                                               |
| 0.924801                    | 12.10083                                      |                             |                                               |
| 0.949283                    | 16.44265                                      |                             |                                               |
| 0.973036                    | 24.65447                                      |                             |                                               |
| 0.982078                    | 29.81453                                      |                             |                                               |
| 0.990331                    | 36.34513                                      |                             |                                               |
| 0.995013                    | 42.48768                                      |                             |                                               |

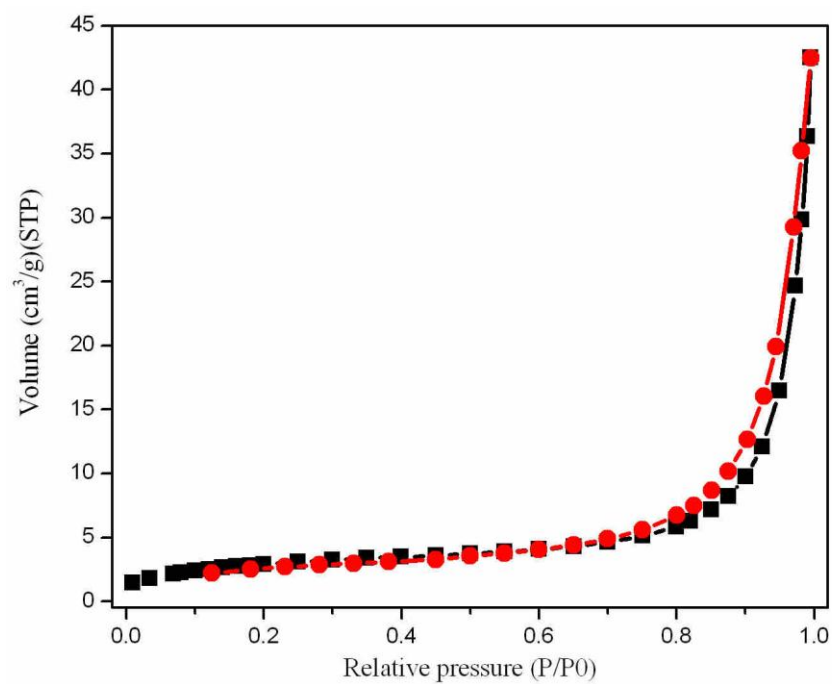

**Figure S0.** Nitrogen adsorption/desorption of the hexagonal Zn<sub>2</sub>GeO<sub>4</sub> nanorod-bundles obtained at 473 K for 24 h.

**Table S1.** Textural, optical properties and hydrogen evolution results of the samples obtained.

**Table S1**

| Catalyst                                | Shape       | $S_{\text{BET}}$<br>( $\text{m}^2 \text{g}^{-1}$ ) | Bandgap energy<br>(eV) | $\text{H}_2$ gas evolved<br>rate ( $\text{mL/h} \cdot \text{g}^{-1}$ ) |
|-----------------------------------------|-------------|----------------------------------------------------|------------------------|------------------------------------------------------------------------|
| Bulk $\text{Zn}_2\text{GeO}_4$          | Particles   | 0.75                                               | 4.5                    | 21                                                                     |
| $\text{Zn}_2\text{GeO}_4\text{-En}^1$   | Nanoribbons | 28.3                                               | 4.57                   | 50                                                                     |
| $\text{Zn}_2\text{GeO}_4\text{-CTAB}^2$ | Nanorods    | 36.0                                               | 4.67                   | 62                                                                     |
| $\text{Zn}_2\text{GeO}_4\text{-TEA}$    | Bundles     | 9.7                                                | 4.61                   | 109                                                                    |

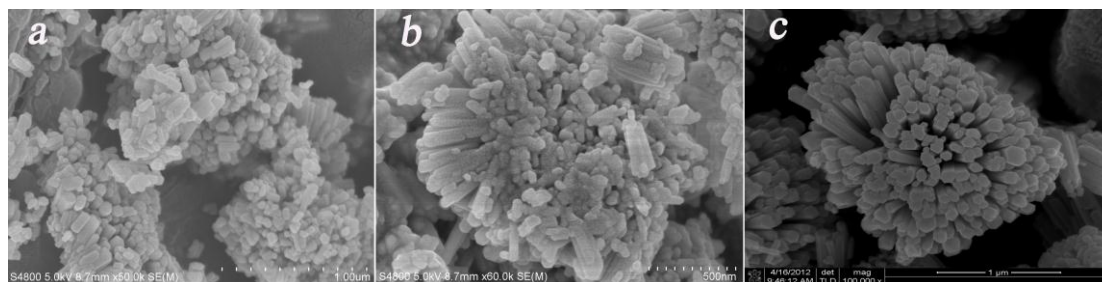

**Figure S1.** SEM images of the products obtained at 473 K with different solvothermal system: (a)  $\text{H}_2\text{O}$ -ethanolamine, (b)  $\text{H}_2\text{O}$ -diethanolamine, and (c)  $\text{H}_2\text{O}$ -triethanolamine.

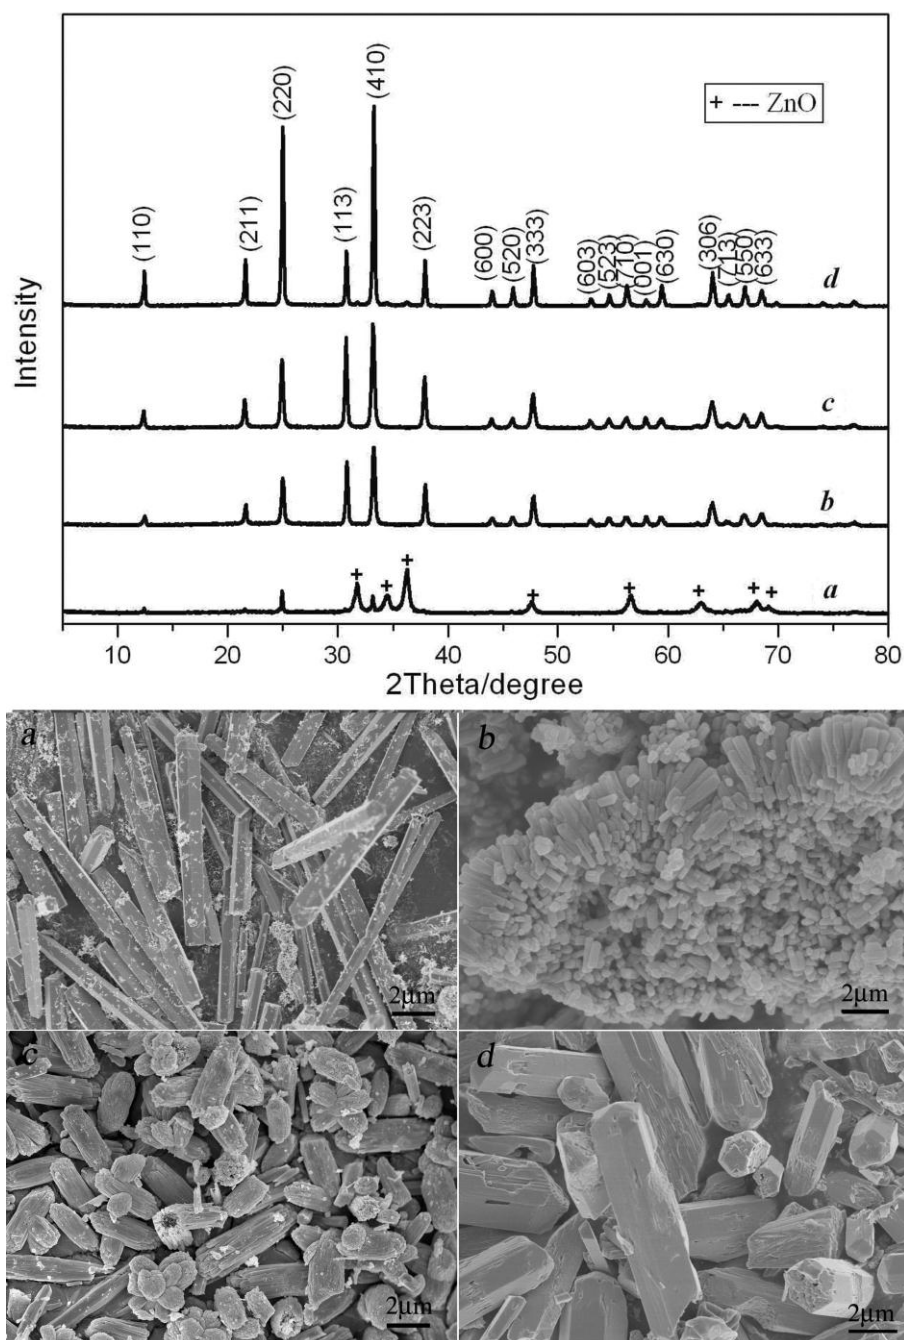

**Figure S2.** XRD patterns and SEM images of the products obtained at 473 K with different NaOH amount: (a) 0.1 g, (b) 0.25 g, (c) 0.4 g, and (d) 0.6 g.

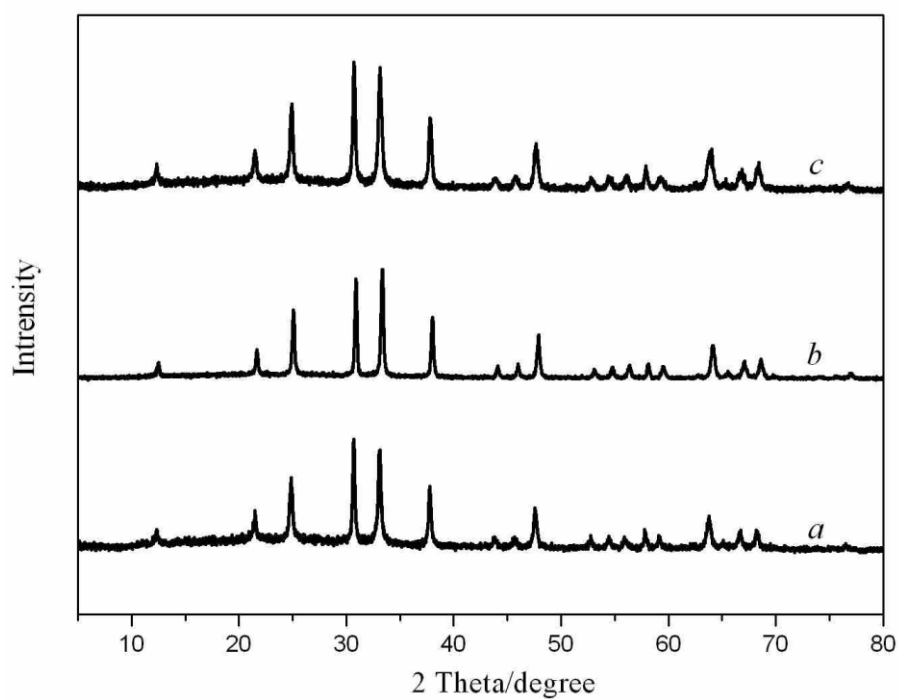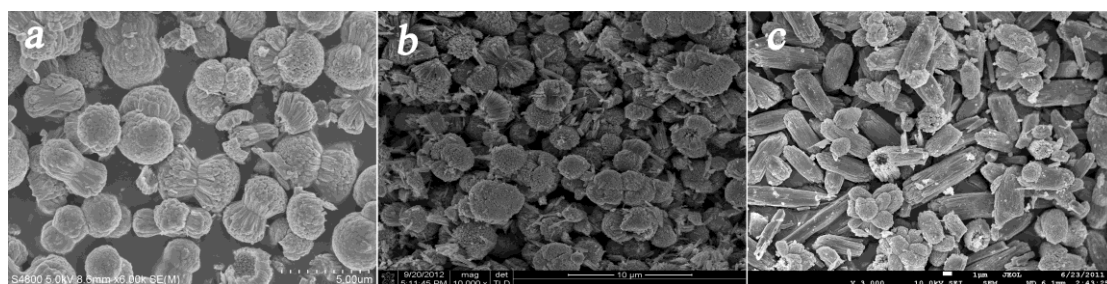

**Figure S3.** XRD patterns and SEM images of the products obtained at 473 K with different solvothermal treatment times of (a) 30 min, (b) 12 h, and (c) 24 h.

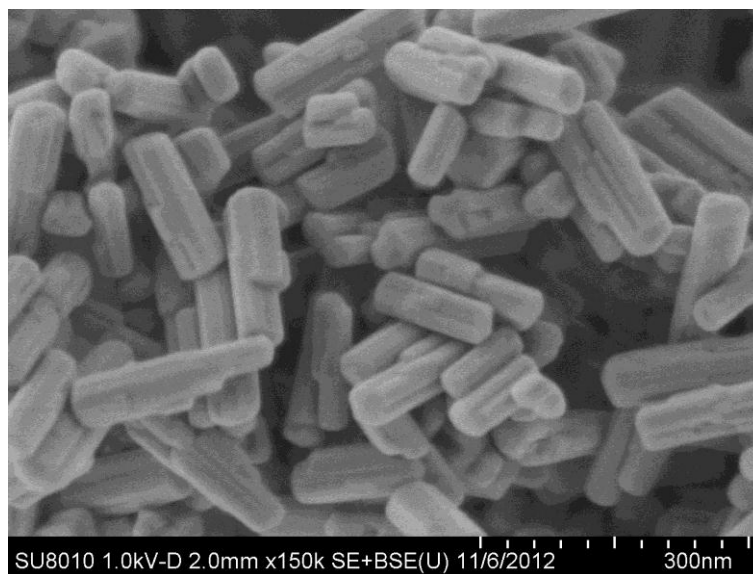

**Figure S4.** SEM images of the hexagonal Zn<sub>2</sub>GeO<sub>4</sub> nanorods prepared by a hydrothermal method.

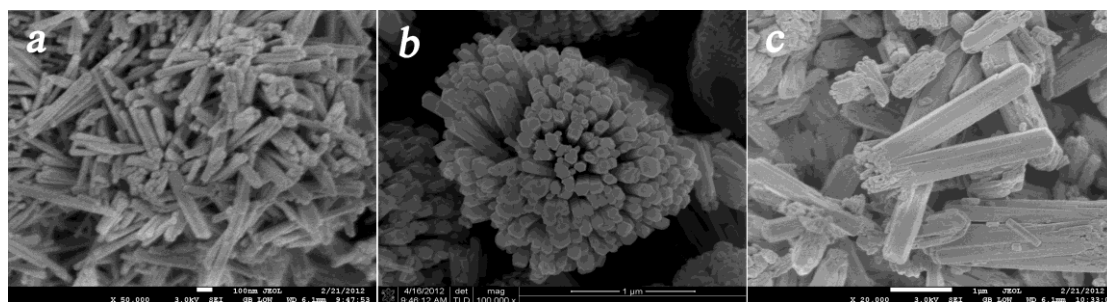

**Figure S5.** SEM images of the products obtained at 473 K with different mass ratio of H<sub>2</sub>O to TEA: (a) 18:2, (b) 15:5, and (c) 10:10.

## References

- (1) Q. Liu, Y. Zhou, J. H. Kou, X. Y. Chen, Z. P. Tian, J. Gao, S. C. Yan and Z. G. Zou, *J. Am. Chem. Soc.*, 2010, **132**, 14385.
- (2) J. Huang, K. Ding, Y. Hou, X. X. Wang and X. Z. Fu, *ChemSusChem*, 2008, **1**, 1011.
